1 ***Streptomyces* and *Bacillus* species utilize volatile organic compounds to impact *Fusarium***  
2 ***oxysporum* f.sp. *vasinfectum* race 4 (Fov4) virulence and suppress *Fusarium* wilt in Pima**  
3 **cotton**

4

5

6 **Lia D. Murty and Won Bo Shim\***

7

8 Department of Plant Pathology & Microbiology, Texas A&M University, College Station, TX

9 77843-2132, USA

10

11

12 \* **For correspondence:** [wbslim@tamu.edu](mailto:wbslim@tamu.edu)

13 **Abstract**

14

15 Emergence of a highly virulent *Fusarium oxysporum* f.sp. *vasinfectum* race 4 (Fov4) with  
16 aggressiveness towards Pima cotton (*Gossypium barbadense*) has raised significant concern for  
17 cotton producers while revealing challenges in soil-borne cotton disease management strategies  
18 which rely heavily on crop resistance and chemical controls. An alternative management approach  
19 uses antagonistic bacteria as biocontrol agents against Fov4. Initial studies showed a unique  
20 combination of bacteria *Bacillus* Rz141 and *Streptomyces* HC658 isolates displayed a mutualistic  
21 relationship capable of altering Fov4 growth. Notably, experimental design placed Fov4 between  
22 each isolate preventing direct physical contact of bacterial colonies. These observations led us to  
23 hypothesize that bacterial volatile organic compounds (VOCs) impact the growth and virulence of  
24 Fov4. Ensuring physical separation, I-plate cultures showed Rz141 had a VOC inhibition of 24%.  
25 Similarly, physically separated cultures of Rz141 and HC658 showed slight increase in VOC  
26 inhibition, 26% with some loss of Fov4 pigmentation. Pathogenicity assays where Fov4-infected  
27 Pima cotton was exposed to VOCs from physically separated Rz141 and HC658 showed VOCs  
28 can suppress Fov4 infection and reduce tissue darkening. Our results provide evidence that  
29 rhizosphere bacteria can use VOCs as a communication tool impacting fungal physiology and  
30 virulence, and ultimately Fov4-cotton interactions without direct physical contact.

31

32 *Keywords: Streptomyces, Bacillus, Fusarium wilt, cotton, volatile organic compounds, biocontrol*

## 33 1. Introduction

34

35 Cotton is an important globally traded commodity worldwide with primary use in the  
36 textile and clothing industry. Cotton is recognized as a major cash crop around the world, and the  
37 socio-economic importance, particularly in developing economies, is well recognized. In the US,  
38 cotton (*Gossypium* spp) is cultivated in many southern states, with Texas as the top cotton  
39 producing state for 2019 with 31.82 and 31.99% of cotton and cottonseed, respectively, of the total  
40 US production [1]. Majority of cotton species cultivated in the US are Upland cotton varieties (*G.*  
41 *hirsutum*), with about 3% of the US production being Pima cotton (*G. barbadense*), a finer and  
42 higher value fiber, mostly grown in California, Arizona, and west Texas [2]. One of the key early  
43 season diseases of cotton is Fusarium wilt caused by *Fusarium oxysporum* f. sp. *vasinfectum* (Fov)  
44 [3, 4]. In the US, Fov race 1 (Fov1) is known to be the predominant pathogen especially in Upland  
45 cotton producing fields. It is important to note that Fov1 requires root-knot nematodes (RKN) to  
46 infect cotton and thus minimizing disease outbreaks with nematicides or RKN resistant cotton  
47 varieties has been largely successful [4, 5].

48 A highly virulent Fov race 4 (Fov4), originating in India, was identified in the California  
49 San Joaquin Valley in 2004 [6], west Texas in 2017 [7], and New Mexico in 2020 [8]. Fov4 was  
50 determined as the pathogen responsible for dead seedlings and black streaks inside tap roots of  
51 wilting Pima cotton plants [4]. The detection of Fov4 in the southwestern US has justifiably caused  
52 alarm in the US cotton industry. Like Fov1, Fov4 colonizes roots and vascular system resulting in  
53 discoloration, wilting and death. Due to its seed-borne and soil-borne characteristics, Fov4 can be  
54 transmitted via seeds and on equipment, raising concerns over containment [9]. Fov4 is now  
55 considered an endemic pathogen in California while the presence in Texas is recent and remains

56 spatially isolated. Though Upland cotton was once thought to be less susceptible to Fov4, we are  
57 now learning that Fov4 may be an inoculum density-dependent disease and can pose serious threat  
58 to Upland cotton production as well [7].

59 As with many soil-borne diseases, the ability to develop and implement control strategies  
60 to reduce plant disease and curtail economic loss is challenging. Fov4, a soil-borne hemi-  
61 biotrophic fungal pathogen, presents a set of lifestyle features, such as the production of  
62 chlamydospores that serve as hardy survival structures [4], infection of seed for potential long-  
63 distance dissemination, and host colonization at root-rhizosphere interface, that may hinder cotton  
64 production and thus demand novel control strategies. In recent years, the application of consortia  
65 of microbes as the new generation of biocontrol strategies is being explored as environmentally  
66 sustainable alternative to chemicals, including for soil-borne plant pathogens [10-12]. Potential  
67 microbial biocontrol agents are species with antagonistic properties against other microbes or those  
68 stimulating systemic resistance in relevant hosts. Amongst many beneficial microbes, two genera  
69 often studied for their antimicrobial properties are *Bacillus* [13, 14] and *Streptomyces* [15, 16].  
70 The potential for using beneficial organisms to enhance productivity in agricultural production  
71 systems is not new. Many bacterial and fungal agents have been tested as a single strain for their  
72 ability to control soil-borne pathogens. However, shaping crop rhizospheres with a beneficial  
73 species-rich microbial community remains a major challenge.

74 Microbes with broad antifungal properties have been attributed to their abilities to produce  
75 secondary metabolites, volatile organic compounds (VOC), and enzymes that contribute to direct  
76 inhibition of pathogens in soil. A recent review by Tilocca, et. al. [17] provides a summary of  
77 microbial VOC diversity, disease suppressive functions, and mediating communication between  
78 bacteria, fungi and plants. The complex relationships between plant growth promoting

79 rhizobacteria (PGPR) and other antagonistic bacteria can produce a wide array of VOCs with  
80 antifungal and plant growth promoting properties [18-20]. Not completely understood is the  
81 contribution of microbial VOCs in the inhibition of Fov4 growth. It should be differentiated that  
82 bacterial VOCs identified as plant growth promoting may not be identical to those causing  
83 pathogen inhibition.

84         The aim of this study was to investigate the role of bacterial VOCs in the interkingdom  
85 communication in cotton rhizosphere, namely between Fov4, Pima cotton, and select bacterial  
86 species. We learned that bacterial VOCs influence Fov4 physiology in our preliminary  
87 experiments. Here, we hypothesized that combinations of antagonistic bacterial species and  
88 resulting VOC profiles can provide more effective and realistic suppression of Fov4 growth and  
89 virulence during Pima cotton infection. To test this hypothesis, we characterized the interaction  
90 between Fov4 versus single and two bacterial isolate co-cultures. The types of VOCs produced  
91 have been shown to be different when plants are added into the communication network, thus  
92 testing combinations of bacteria in the presence of Fov4 and cotton plants was vital [12]. We tested  
93 the efficacy of the bacterial VOCs by measuring Pima cotton health infected with Fov4.

94

## 95 **2. Materials and methods**

96

### 97 *2.1. Pathogen and antagonistic isolates*

98         *Fusarium oxysporum* f. sp. *vasinfectum* race 4 (Fov4) strain used in this study was  
99 isolated from diseased Pima cotton plants acquired from El Paso, Texas (Courtesy of Dr. Tom  
100 Isakeit, Texas A&M AgriLife Extension). Identification of this Fov4 isolate was confirmed using  
101 the method described in Doan, et. al. 2014 and AmplifyRP<sup>®</sup> Acceler8<sup>®</sup> for Fov4 rapid DNA kit

102 (Product No. ACS 19700/0008) [6]. Fov4 culture was maintained on ISP2 agar at 4°C and  
103 conidia suspensions used in subsequent studies were made by flooding 7-14 day agar cultures  
104 with sterile water and filtered through double layered sterile miracloth before concentration was  
105 determined using a hemocytometer. Concentration was adjusted as needed with sterile deionized  
106 water.

107 Antagonistic bacteria were isolated from topsoil samples from both a Pima cotton-  
108 producing field (El Paso County, Texas, USA) as well as a non-cotton-producing field as an  
109 outgroup (Harris County, Texas, USA) to isolate a diverse collection of bacteria. Soil was air dried  
110 and sifted soil prior to using common isolation techniques for species in *Actinomyces* genus [21-  
111 24]. Subculturing until single colony isolation was achieved used ISP2 media for its ability to  
112 support growth of a broad range of bacteria and fungi as well as VOC production [18]. Seed-borne  
113 bacteria were also utilized as a source of antagonistic bacteria. Seed associated bacteria were  
114 isolated from 7-week-old Pima cotton plants ( $n=6$ ) showing no sign of disease [4, 25, 26].  
115 Antagonistic isolates were maintained at 22°C on ISP2 media and stored at 4°C for routine use.  
116 Liquid cultures of antagonistic bacterial isolates were prepared in ISP2 broth and grown at 22°C  
117 for 2-5 days on an orbital shaker at 100 rpm.

118

## 119 *2.2. Screening and identification of isolates with antifungal properties against Fov4*

120 To select bacterial isolates showing Fov4 inhibitory properties, we developed a screening  
121 method where Fov4 was spot inoculated along with four different bacteria, each 2.5 cm from the  
122 center and equal distant from other bacterial isolates, on a single ISP2 agar plate (Fig. S1a). Isolates  
123 which produced an inhibition zone where Fov4 growth was hindered around the bacterial colony  
124 were selected. Examples of observed inhibitions zones shown in Fig. S2a.

125 For identification of bacterial species showing anti-Fov4 properties, we used 16s rRNA  
126 sequencing. The first set of primers, 16Sf (5'-AGA GTT TGA TCC TGG CTC AG-3') and 16Sr  
127 (5'-GGT TAC CTT GTT ACG ACT T-3'), was used to amplify 16S rDNA for all isolates. Primers  
128 StrepF (5'-ACG TGT GCA GCC CAA GAC A -3') and StrepB (5'-ACA AGC CCT GGA AAC  
129 GGG GT-3'), were used to further identify *Streptomyces* species [27]. Template DNA was  
130 extracted using Genomic DNA Purification Kit (Thermo Scientific), except for isolates displaying  
131 *Streptomyces* colony characteristics. Predicted *Streptomyces* species DNA was extracted by  
132 placing colonies into TE buffer and microwaving for 30 seconds followed by centrifugation for 10  
133 minutes at 1,400 rpm [15]. PCR with Taq polymerase was performed in a 25- $\mu$ l volume tube  
134 following the manufacture's guidelines (New England Biolabs, Ipswich, MA, [www.neb.com](http://www.neb.com)).  
135 PCR amplicons were visualized by agarose gel electrophoresis, subsequently purified using  
136 GeneJet Purification Kit (Thermo Fisher Scientific, Waltham, MA) and sequenced (Eton  
137 Biosciences, Inc., San Diego, CA). Retrieved sequences were subjected to BLASTn analysis  
138 against the NCBI non-redundant database to assign identities to bacterial isolates at the deepest  
139 possible taxonomic resolution (<https://blast.ncbi.nlm.nih.gov/Blast.cgi>). Sequences were aligned  
140 using Multiple Sequence Alignment (MSA) in Clustal-Omega software  
141 (<https://www.ebi.ac.uk/Tools/msa/clustalo/>). MSA produced a Neighbour-joining tree which was  
142 used to confirm bacterial isolates were all uniquely different.

143

### 144 2.3. Bacteria - Fov4 antagonism assays

145 Here, we tested whether different combinations of bacterial isolates can synergistically  
146 enhance Fov4 growth inhibition. Single isolate inhibition assays consisted of two opposing 10  $\mu$ l  
147 spots (Fig. S1b), while two isolate experiments consisted of one 10  $\mu$ l spot inoculation for each

148 isolate (Fig. S1c). Fov4 growth area was measured by ImageJ software  
149 (<https://imagej.nih.gov/ij/index.html>) at 10-12 days post inoculation, when Fov4 growth on  
150 control samples (devoid of bacteria) covered the entire agar plate. Examples of agar petri dishes  
151 used to calculate Fov4 inhibition from co-culture of single (Fig. S2b ) and two isolate combinations  
152 (Fig. S2c) are shown in supplementary material. Percent inhibition of Fov4 was calculated using  
153 the equation  $(\text{Positive Control Fov4 Area} - \text{Treatment Fov4 Area}) / (\text{Positive Control Fov4 Area}) \times$   
154  $100\%$ . Significance in growth inhibition was determined by comparing treatment groups to  
155 negative control using a one-way ANOVA followed by Tukey's multiple comparisons post-test  
156 using a 95% confidence interval on GraphPad prism software (San Diego, CA). Experiment was  
157 performed with three biological replicates.

158

#### 159 *2.4. Impact of bacterial VOC on Fov4 growth*

160 To determine the impact of VOCs on inhibition of Fov4, we used compartmentalized petri  
161 dishes in which bacterial isolate was physically separated from Fov4 with only interaction possible  
162 by VOCs and not agar-soluble metabolites. Single isolates were tested in 2-compartment petri dish  
163 (I-plate,  $n=3$ ) and combinations were tested in 4-compartment petri dish (Q-Plate,  $n=3$ ) to ensure  
164 physical separation of the isolates. To each compartment of bacteria, 120  $\mu\text{l}$  of liquid culture was  
165 streaked over the entire area of the compartment. As for Fov4, 10  $\mu\text{l}$  conidia suspension ( $1 \times 10^4/\text{ml}$ )  
166 was added to the center of the compartment. Radial diameter measurements were taken at 4 days  
167 post inoculation (dpi) and used to calculate fungal growth area. Negative controls for both I-plates  
168 and Q-plates were measured to ensure the radius was not statistically different between the VOC  
169 treatment groups.



170 To measure the impact of bacterial VOCs on Fov4 in liquid culture, we used  
171 spectrophotometry (absorbance reading at 350 nm) to assess fungal growth. In a 24 well plate, 10  
172  $\mu$ l of liquid culture of bacteria in ISP2 broth was added to 1 ml of ISP2 broth of row a and/or row  
173 c. To row b, 10  $\mu$ l of Fov4 conidia suspension ( $1 \times 10^4$ /ml) was added to 1 ml of ISP2 broth. Row  
174 d of every plate only contained ISP2 broth which served as a negative control and normalization  
175 for the absorbance readings. Toothpicks were added to the left and right side of the plate to slightly  
176 prop the 24 well plate lid up and then the entire plate was sealed with parafilm. The plates were  
177 shaken at 100 rpm for 3 days. Absorbance readings were taken on 3 dpi at 350 nm on a Spectral  
178 Max ID5 plate reader. This wavelength was determined through software optimization. Data were  
179 collected for 6 wells of Fov4 per plate and one plate per treatment group. Plates with Fov4 and  
180 only one bacterial isolate served as controls to compare against the combinations of bacteria.  
181 Measurements were subject to a one-way ANOVA followed by a Tukey's post-test using  
182 GraphPad Prism (San Diego, CA) to determine significant differences with a 95% confidence  
183 interval,  $p < 0.05$ .

184

### 185 *2.5. Soil-free Fov4 virulence assay development and VOC impact on Fov4 infection*

186 To further study the effects of bacterial VOCs on Fov4 virulence, we designed a soil-free  
187 assay that allowed us to test fungal virulence while minimizing variability due to biotic and abiotic  
188 factors, such as seed health and soil characteristics. First, Pima cotton seeds (PhytoGen, No.  
189 PHY841RF) were initially surface sterilized in 10% bleach and 70% ethanol and rinsed in sterile  
190 water three times. Seeds were then placed onto sterile cotton circles and covered with a second  
191 cotton circle. Sterile double deionized water (5 ml) was applied to cotton circles, placed inside of  
192 plastic sandwich bags, and incubated under natural light/dark cycle for approximately 5-7 days

193 until cotyledon leaves emerged (Fig. S3a). Once seedlings had reached between 5-7 cm in shoot  
194 and primary root length, they were placed on a fresh sterile cotton circle in a new petri dish for the  
195 experiment (Fig. S3c-e).

196 To prepare pathogen inoculum for Fusarium wilt virulence assay on Pima seedlings, twice  
197 sterilized steel cut oats (SCO: 20 g organic steel cut oatmeal and 20ml water) in 100 ml Erlenmeyer  
198 flasks were inoculated with 1 ml Fov4 conidia suspension ( $1 \times 10^8$  conidia/ml). The flasks were  
199 incubated at 28°C for 5-7 days with periodic shaking to maximize fungal growth (Fig. S3b). When  
200 cotton seedlings and Fov4 inoculum were ready, we placed Fov4 SCO (1.5 g) on Pima seedlings  
201 so that SCO covered the primary root (Fig. S3c-d). A half circle or quarter circle covered the roots  
202 and SCO leaving the root shoot junction, shoot, and leaves visible. Before sealing the plates, sterile  
203 water (4 ml) was added to the top half or quartered cotton circle (Fig. S3f). These petri dish plates  
204 were placed under a 12 hr light/dark cycle at 22°C, and after 6 days the seedlings were removed  
205 for examination of Fusarium wilt symptoms. Autoclaved SCO not inoculated with Fov4 served as  
206 the negative control. The experiment was completed twice with 8 replicates each containing 2  
207 subsamples for a total of 32 seedling observations. An example of one replicate is shown in Fig.  
208 S3h. External tissue was evaluated for color differences between negative (Fov4-) and positive  
209 (Fov4+) at the RSJ, shoot, and leaf wilt. Healthy uninfected seedlings were those which displayed  
210 characteristics of the natural seedling variation, such as green or pink RSJ, green shoots, and no  
211 wilting or severe discoloration in the leaves. Those which differed were considered related to Fov4  
212 infection. Natural seedling variation using this method was optimized by monitoring cotton  
213 seedlings in plates with or without SCO or a parafilm seal around the petri dish. The natural  
214 variation was assessed without Fov4 or bacteria.

215 To test the impact of bacterial VOCs on Fov4 virulence, we adjusted our method so that  
216 one seedling was placed in an empty compartment of either an I-plate (2 compartments) to expose  
217 the seedling to one bacterial isolate VOCs or a Y-plate (3 compartments) to expose the infected  
218 seedling to VOCs from two physically separated bacterial isolates (Fig. S3f-g). In an I-plate petri  
219 dish, one side was filled with 10 ml of ISP2 agar and the other was used for cotton seedling. In a  
220 Y-plate, two compartments were filled with 10 ml of ISP2 agar and the remaining compartment  
221 was used for cotton seedling. To the ISP2 compartments, 120  $\mu$ l of liquid ISP2 bacterial culture  
222 was streaked over the entire area 2-3 days prior to adding Fov4 SCO and seedlings to establish  
223 colony growth and VOC production. Plates were sealed with seedlings once all components were  
224 set up as described. The experiment was completed twice, with four replicates and a second  
225 experiment with 8 replicates for a total of 12 observations for disease assessment.

226

## 227 *2.6. Fusarium wilt assessment with VOC exposure*

228 To comprehensively evaluate disease progression under the exposure to bacterial VOCs,  
229 we examined the treatment groups based on the external tissue color gradient as a measure of  
230 disease severity. We previously determined that terminating experiments 5-6 dpi was ideal because  
231 the roots were still intact but showing clear symptoms of Fov4 infection which allowed for suitable  
232 evaluation of treatment groups. Incubating longer than 6 days resulted in complete rotting of the  
233 plants which made assessing disease difficult when comparing treatment groups against the  
234 controls. Additionally, the longitudinal section of the RSJ was observed under 0.4x magnification  
235 of internal tissue for symptoms of infection [28]. Disease severity was assessed using a color  
236 gradient of the RSJ and shoot color in addition to the number of seedlings with wilted leaves;  
237 disease was associated with RSJ and shoot colors of brown, black, and dark purple. Non-diseased

238 seedlings showed RSJ of green-white, green-pink, and solid pink. The shoot color assessment was  
239 based on the same color gradients. The number of observations for each treatment group were  
240 analyzed on a contingency table setting in Graphpad Prism (San Diego, CA) and reported as  
241 percentage of column total, the observed colors on the RSJ, shoot, and incidence of leaf wilt. For  
242 example, a column containing number of observations for pink coloring of the RSJ shows 25 total  
243 observed pink RSJ, and 95% of the observations were associated with the negative control  
244 treatment group.

245

### 246 **3. Results**

247

#### 248 *3.1. Bacillus, Streptomyces, Brevibacillus and Paenibacillus sp. isolated from soil and rhizosphere*

249 Based on preliminary screening results, a total of seven isolates, four from El Paso County  
250 soil samples (ELP524, 528, 529 and 745), one from Harris County soil samples (HC658), and two  
251 from Pima cotton root rhizosphere samples (RZ141 and 160), were selected for further  
252 investigation. RZ141 (Fig. 1a) exhibited white rippled appearance with fast and lateral growth.  
253 RZ160 colonies were light cream colored with smooth surface and turned dark brown as the  
254 colonies matured (Fig. 1b). ELP524, 528 and 529 all shared similar colony morphology as shown  
255 in Fig. 1c, but with varying colony pigment of cream colored to brown. These strains produced  
256 rippled and harder form as the colonies matured. HC658 showed small white spore-forming  
257 colonies which resembled typical *Streptomyces* colony phenotypes (Fig. 1e). ELP745 also showed  
258 common *Streptomyces* morphology but produced a noticeable brown pigment in ISP2 agar (Fig.  
259 1f). Subsequently, we performed species identification using 16S rRNA gene sequences, which  
260 were subjected to BLASTn searches against the NCBI non-redundant database. Top five hits (with

261 lowest E-value) were used to assign taxonomic identities to bacterial isolates: ELP524  
262 (*Paenibacillus* sp., 531 bp, 99.14% identity), ELP528 (*Paenibacillus* sp., 600 bp, 97.54% identity),  
263 ELP529 (*Paenibacillus* sp., 1237 bp, 99% identity), ELP745 (*Streptomyces* sp., 604 bp, 94.56%,  
264 identity), HC658 (*Streptomyces* sp., 1057 bp, 99.5% identity), RZ141 (*Bacillus* sp., 129 7bp, 98%  
265 identity), and RZ160 (*Brevibacillus* sp., 1314 bp, 97% identity). Phylogenetic trees were  
266 constructed for the *Firmicutes* species (Fig. 1d) and *Streptomyces* species (Fig. 1g) separately  
267 using Clustal Omega alignment and Neighbour-joining tree generation to show distinct species  
268 were isolated and related to other species of the same genus.

269

### 270 3.2. *Bacillus Rz141* and *Streptomyces HC658* inhibit *Fov4*

271 We performed dual culture antagonism assays to determine whether a specific bacterial  
272 isolate can exhibit enhanced *Fov4* growth inhibition when inoculated as a single colony, multiple  
273 colonies, or in combination with other bacterial strains. Our underlying premise was that the  
274 microbial community in soil rhizosphere can have impact on *Fov4* that is distinct from single  
275 bacterium-*Fov4* association. The experiment was conducted with three replicates, and when the  
276 *Fov4*-only negative control showed fungal growth covering the entire area of the petri dish, the  
277 experiment was terminated, and final area measurements recorded. The mean *Fov4* area from  
278 single isolate inhibition was calculated, and all measured areas showed mean standard deviation  
279 less than 5 and coefficient of variation less than 10%. Mean area measurements were subjected to  
280 one-way ANOVA and Tukey post-test where all isolates showed statistical differences ( $p < 0.01$ ,  
281 Table 1a) when compared to negative control. Calculated percent inhibition showed RZ141 (Fig.  
282 2b) with the highest inhibition of 52% (Table 1a).

283           The combinations of bacteria which showed no statistical significance ( $p > 0.05$ ) were  
284 HC658/ELP745, ELP528/HC658, ELP529/Rz160, Rz160/ELP745, and Rz160/HC658. Two  
285 isolate combinations, with  $p < 0.05$ , showed inhibition between 21-46%. Since Rz141 was the best  
286 single isolate inhibitor, we focused on Rz141 combinations. The top three highest inhibition were  
287 Rz141 combinations with ELP528, 524, and 529 with inhibition of 46, 37, and 36%, respectively.  
288 Upon closer examination of *Paenibacillus* species combinations, physical colony formation was  
289 inconsistent and thus we removed *Paenibacillus* species from further experiments (Fig. S2 c4). Of  
290 remaining Rz141 combinations, Rz141 and HC658 showed the highest inhibition (28%, Table 1a,  
291 Fig. 2c) and resulted in smallest Fov4 area (Fig. 2d). Based on these outcomes, we selected Rz141  
292 and HC658 combination for its impact on Fov4 pathogenesis with emphasis on the role of bacterial  
293 VOCs.

294

### 295 *3.3. Rz141 and HC658 show synergistic VOC inhibition of Fov4*

296           In addition to secreted antifungal metabolites produced by bacteria, VOCs are recognized  
297 as another important form of compounds that mediate inter-species and inter-kingdom signaling.  
298 Bacterial VOCs have been shown to impact growth of fungi and plants [18-20]. Based on the best  
299 performing and most reproducible antagonistic combination, we investigated the capability of  
300 Rz141 with HC658 to inhibit Fov4 growth only through VOC interactions. The use of  
301 compartmentalized petri dishes provided a robust method for investigating VOC inhibition  
302 capabilities towards Fov4. Results for the VOC antagonism from Rz141 and HC658 combination  
303 are shown in Table 1b.

304           After terminating the VOC experiment at 4 dpi, the measurements of Fov4 area from each  
305 treatment group were collected and mean areas were calculated. Measurements for all replicates

306 ( $n=3$ ) showed standard deviation less than 1 and coefficient of variation less than 14% (Fig. 3e).  
307 The one-way ANOVA and Tukey's post-test of mean Fov4 area from each treatment group  
308 showed no statistical significances of the negative control (Fig. 3a) against HC658 (Fig. 3b,  
309  $p=0.3484$ ). However, there was statistical significance between the negative control and Rz141  
310 (Fig. 3c,  $p = 0.0037$ ). Furthermore, there was an increased statistical significance between the  
311 negative control and the Rz141 with HC658 combination (Fig. 3d,  $p = 0.0006$ ). Table 1b shows  
312 calculated inhibition resulting from VOC exposure to Rz141 and HC658. Individually, inhibition  
313 was 9% for HC658 and 24% for Rz141, while Rz141 and HC658 combination resulted in 26%  
314 inhibition of Fov4 growth. This outcome suggested that Rz141 is the predominant anti-Fov4 VOC  
315 producing strain with HC658 playing a supplementary role. The combination of two bacteria  
316 enhanced the inhibition of Fov4 when tested on agar plates and did not result in any loss of  
317 inhibition properties. In 24-well liquid culture assays, the procedure was sufficient at determining  
318 effects on Fov4 through measuring absorbance. Row D, the negative control containing only ISP2  
319 broth, showed no variation in absorbance measurements indicating no spillover between wells.  
320 The 350 nm wavelength was sufficient at distinguishing between treatment group shown through  
321 the one-way ANOVA, Tukey's multiple comparisons test which also showed  $p$  values  $<0.0001$  for  
322 combination of VOCs from Rz141/HC658 to Fov4. The absorbance of Fov4 at 350 nm showed  
323 that Fov4 exposed to the combination also had a lower absorbance than Fov4 exposed to single  
324 isolates (Fig. 3f).

325

### 326 *3.4. Soil free pathogenicity assay*

327 Based on the Fov4 inhibition caused by a combination of bacterial VOCs, we continued to  
328 add more participants to the interkingdom communication network, specifically the host plant

329 Pima cotton. We tested the hypothesis that bacterial VOCs can provide Fov4 suppression during  
330 the infection of Pima cotton seedlings. Utilizing a soil-free pathogenicity assay with  
331 compartmentalized petri dishes, we were able to investigate the impact of Rz141 and HC658 VOCs  
332 on pathogen progression during infection of Pima cotton seedlings. However, we first ensured our  
333 plant pathogenicity assay could distinguish between Fov4 infected (Fov+) and uninfected (Fov4-)  
334 seedlings. Initial studies, without bacteria or Fov4, tested seedling response to various  
335 experimental set ups with and without SCO or parafilm seal around the petri dish (Fig. S2). A  
336 second study introducing Fov4 was used to establish disease severity criteria (Fig. 4).

337         The first experiment aimed to establish root shoot junction (RSJ) and shoot colors  
338 associated with natural variation of Pima seedlings associated with experimental set up and low  
339 disease severity. Groups of 8 replicates were examined over six days and low severity was  
340 established as green and green with pink shading (Fig. 4a,b) of the RSJ and shoot color. Moderate  
341 rating was associated with a darker and more solid coloring of pink (Fig. 4c). Moderate rating was  
342 not seen consistently across all groups like low severity. Fig. 4d shows microscopic examination  
343 of internal tissue of the RSJ which is vibrant green. Fig. 4e shows a representative example of what  
344 was considered non-wilted leaves. The number of observations were evaluated in a contingency  
345 table model where the dataset was arranged in columns and percentages were calculated based on  
346 the number of observations (Low, Moderate, High, No wilt, wilt) divided by the column total for  
347 each experiment. Utilizing a petri dish with SCO covering seedling primary roots and a parafilm  
348 seal around the petri dish was chosen due to the greatest incidence of low severity ratings when  
349 compared to other set ups. No seal with SCO was eliminated due to the high percentage of wilted  
350 leaves observed (48%).



351           Using Fov4 SCO inoculum on Pima cotton seedlings, we were able to establish the “high  
352 disease severity” criteria at 6 dpi in a petri dish sealed with parafilm. RSJ and shoot colors  
353 associated with infection were dark brown, black, or dark purple coloring (Fig. 4f-h). Internal  
354 tissue of RSJ (Fig. 4i) also showed brown coloring. Leaves from the Fov4+ group showed wilting  
355 and darkening (Fig. 4j). The positive control group accounted for 100% of all high severity ratings  
356 of both RSJ and shoots. Wilt was associated more with the positive group, 91%. Moderate ratings  
357 were still associated with the Fov4- groups.

358

### 359 *3.5. Bacterial VOCs impacted Fov4 virulence on Pima cotton infection*

360           After determining that our soil-free pathogenicity assay was able to distinguish between  
361 healthy and Fov4-infected Pima cotton seedlings, we investigated the impact of bacterial VOCs  
362 from Rz141 and HC658 on Fov4 virulence. These assays were independently performed twice,  
363 once with 4 replicates and another with 8 replicates for a total of 12 seedling observations and each  
364 experiment was terminated 6 dpi. Negative (Fov4-) and positive (Fov4+) controls showed visible  
365 symptoms indicating low and high disease severity. Observations of Fov4- internal RSJ tissue  
366 showed low severity, vibrant green, while Fov4+ (Fig. 5b) had the darkest tissue. The treatment  
367 groups Rz141 (Fig. 5b), HC658 (Fig. 5c), and Rz141 and HC658 combination (Fig. 5d) showed  
368 less tissue darkening than the positive control. Additionally, the observations of external RSJ tissue  
369 coloring showed noticeable differences among groups (Fig. 5e).

370           Table 2 shows disease severity observed between treatment groups with and without  
371 bacterial VOCs (+Rz141, +HC658). Of the treatment groups, the negative control accounted for  
372 the highest portion of low severity (52%) while the positive control resulted in the largest portion  
373 of high severity (35%). Similar distribution was also seen for shoot and wilt observations. In

374 treatment groups, +HC658 had the lowest severity rated RSJs. The combination (+Rz141 and  
375 +HC658) had the largest proportion of low rated shoot colors. Both groups +HC658 and  
376 combination accounted for 21% of the total no wilt rated leaves. Moderate ratings, solid pink  
377 coloring, were associated with RSJs in the VOC treatment groups (33% Rz141, 17% HC658, and  
378 50%Rz141 with HC658). When observing moderate ratings in shoot colors, VOC treatment groups  
379 (19% Rz141, 29% HC658, and 19%Rz141 with HC658) still accounted for greater percentage than  
380 the Fov4+ group (14%).

381

#### 382 4. Discussion

383

384 The bacterial isolates collected and investigated in this research, including *Bacillus* [29,  
385 30], *Streptomyces* [15, 16], *Paenibacillus* [31-33], and *Brevibacillus* [34-36] species, are widely  
386 acknowledged with their antifungal properties and some are commercially used as biocontrol  
387 organisms. Notably, *Bacillus* species have shown incredible potential as biocontrol agents because  
388 of their antimicrobial metabolites and enzymes [12-14, 30, 37]. In addition to producing soluble  
389 metabolites with antifungal capacities, *Bacillus* species have been shown to synthesize diffusible  
390 VOC compounds that are capable of inhibiting *F. oxysporum* f. sp. *radicis-lycopersici*, *F.*  
391 *verticillioides* [30] and *F. oxysporum* f. sp. *cubense* [29]. Generally, alcohols, aldehydes, and  
392 ketones have shown inhibitory properties against fungal pathogens [12, 13]. More specifically,  
393 single compound exposure to propanone, 1-butanol, 2-butanone, 3-hydroxy-2-butanone, and 2-  
394 methyl propanoic acid reduced the mycelial growth of *F. oxysporum* f. sp. *lactucae* [14]. Carbon  
395 disulfide even prevented the growth of *F. oxysporum* f.sp. *lactucae* completely [14]. *Streptomyces*  
396 species are prominently recognized for producing antibiotics [38-40], but VOCs from

397 *Streptomyces* species are gaining much notoriety for their biocontrol applications [15, 16, 18, 41].  
398 While both *Streptomyces* and *Bacillus* species produce some of the same VOCs, such as alcohols  
399 and ketones, *Streptomyces* produces distinct VOCs which can inhibit *F. oxysporum* species [15,  
400 16, 18, 41]. The aromatic hydrocarbon 4-methoxystyrene was found to be a very effective  
401 inhibitor of *F. oxysporum* with less effective VOCs being anisole, 2-pentylfuran, tetradecane,  
402 styrene, and toluene [16]. Common among *Streptomyces* are terpenoid compounds geosmin and  
403 2-methylisoborneol. However, these compounds are not specifically recognized as antifungal or  
404 fungistatic compounds [15, 41]. It is noteworthy that researchers are reporting *Streptomyces* VOCs  
405 showing effective inhibition against *Pyrenochaeta lycopersici*, *Sclerotium rolfsii*, *F. oxysporum*  
406 [16] and *Rhizoctonia solani* [15]. A common theme among reviewed literature was the VOC  
407 inhibition of fungal pathogens was species specific among bacterial and fungal species [42]. As  
408 we continued with our experiments in this study, we were intrigued by the possibility that co-  
409 exposure of *Bacillus* and *Streptomyces* species can impact Fov4 physiology and virulence through  
410 VOCs.

411 In this study, we observed the reduction in Fov4 mycelial growth on agar media and  
412 suppression of Fov4 infection in cotton through the exposure to *Streptomyces* and *Bacillus* VOCs.  
413 Published reports demonstrated the inhibitory effects of VOCs from *Streptomyces* and *Bacillus*  
414 species on fungal growth, including *Fusarium* species, *Botrytis cinera*, *Alternaria brassicola*, *A.*  
415 *brassicae*, and *Sclerotinia sclerotiorum*. These effects are mostly inhibition of mycelial growth  
416 [15, 30, 43] and conidia germination [13, 14]. *Streptomyces* strains have been shown to produce  
417 numerous VOCs, and a combination of VOCs is responsible for antifungal properties rather than  
418 a single compound [16]. Effects of bacterial VOCs on fungal growth is likely shorter in duration  
419 and does not completely kill fungal cells because once removed from VOC source, Fov4 has

420 regained growth although at different rates relative to controls [15, 16]. Our data support these  
421 findings as exposure to VOCs did not completely prevent infection but slowed down *Fusarium*  
422 wilt pathogenesis and produced different visual symptom progression than positive controls.

423 Adverse effects solely from bacterial VOCs on plant health but not from the presence of  
424 pathogens have previously been reported [12, 13]. These outcomes were not observed in our study.  
425 For instance, Asari et. al. (2016) found that *Bacillus* species grown on different media had either  
426 beneficial or adverse effects on *Arabidopsis thaliana*. Negative effects were observed when  
427 *Bacillus* species was grown on tryptic soy or LB broth agar medium while *Bacillus* grown on M9  
428 agar showed plants that were not distinguishable with the negative controls [13]. While we did not  
429 test different growth media for the bacteria cultivation, we did test the impact of VOCs without  
430 the presence of pathogen and subsequently observed no adverse effects on Pima cotton. In this  
431 study we did observe the loss of pigment production in Fov4 cultures when exposed to bacterial  
432 VOCs. The loss of pigment production in *F. oxysporum* has been documented in earlier studies  
433 when the fungus was exposed to *Paenibacillus* and *Bacillus* VOCs, which does raise an interesting  
434 question on whether Fov4 secondary metabolites have key roles in virulence and growth [14, 33,  
435 42]. VOCs from a *Bacillus* species was shown to emit 2-3-butanedione and tetramethyl pyrazine  
436 which were suspected of causing the reduction in pink pigment of *F. oxysporum* f. sp. *lactucae*  
437 [14]. One study found that citronellol from *Paenibacillus polymyxa* prevented pigment production  
438 in *F. oxysporum* [42]. The loss of pigment in Fov4 from exposure to bacteria VOCs and whether  
439 this physiological change is correlated to loss of virulence need further investigation.

440 As described by Bell et. al. [5], Fov4 does not require root-knot nematode for cotton  
441 infection, which raises some intriguing questions regarding the mode of infection when compared  
442 to Fov1. It is also confounding to note that wounding and direct injection of Fov4 inoculum into

443 cotton seedlings does not provide reliable symptom development in laboratory assays [9].  
444 Therefore, current Fov4 pathogenicity assay relies on indirect fungal inoculum injection into soil  
445 where cotton seedlings are grown, and this practice can lead to inconsistent and sometime non-  
446 reproducible assay results [5, 7]. With our soil-free assay system, we were able to achieve high  
447 reproducibility among treatment groups. In other soil pathogenicity assays, the assessment of  
448 disease was mostly done on above ground parts by measuring shoot growth suppression, leaf  
449 yellowing and overall plant wilting [5, 7, 9]. Here we were able to monitor above-ground disease  
450 symptom development but also examine root system when experiment was terminated. Symptoms  
451 in conventional Fov4 pathogenicity assays in soil were evaluated at 38 dpi [7], while symptoms in  
452 our study were observable at 6 dpi. As described earlier, some of the recent modified Fusarium  
453 wilt assays required large amount of pathogen inoculum, transplanting of cotton seedlings, and  
454 inefficient inoculation strategies [25, 44, 45]. Additionally, our method was easily adaptable to  
455 exposing Pima seedlings to bacterial VOCs by placing seedlings with SCO inoculum in an empty  
456 well of a divided petri dish. We acknowledge that this is an artificial assay system that does not  
457 truly reflect cotton production field conditions. But for our VOC assays, with sufficient replicates  
458 and control samples, this approach allowed us to determine the difference between VOC treated  
459 and non-VOC treated Fov4 infected Pima seedlings.

460 Our study showed that bacterial VOCs from *Bacillus* and *Streptomyces* isolates are capable  
461 of suppressing Fov4 infection, and this outcome has practical and fundamental research  
462 implications. First is the prospect of developing VOCs as commercially available biocontrol agents  
463 Currently, many biocontrol agents are sold as whole organisms intended for agricultural use, such  
464 as foliar applications, to control for certain pests and pathogens. In 2019, for Upland cotton  
465 production in Texas, only 5% of suppression methods used biological pesticides while plowing

466 down crop residue with conventional tillage accounted for 68% of prevention methods used on  
467 Upland cotton cultivation [1]. There are possibilities for biological pesticides in cotton production.  
468 More research into prevention and suppression methods in response to Fov4 will be vital as Pima  
469 cotton production is predicted to increase in Texas [2]. The second research implication is the  
470 prospect of recognizing VOCs as a communication tool in soil microbial community and gaining  
471 a deeper understanding on how VOCs mediate plant infection at molecular levels. Additionally,  
472 there exists an opportunity for metabolomic characterization of VOCs from Rz141 and HC658 to  
473 test the hypothesis that specific or a combination of VOC metabolites is eliciting aggressiveness  
474 in Fov4 or susceptibility in the plant. Further research will offer a new opportunity to understand  
475 the fundamental mechanisms involved in microbial community interactions via VOCs that lead to  
476 plant pathogenesis in root rhizosphere.

477

#### 478 **Declaration of Competing Interest**

479 The authors declare no conflict of interest.

480

#### 481 **Acknowledgements**

482 The authors would like to thank Dr. Tom Isakeit, Texas A&M AgriLife Extension for  
483 providing Fov4 isolates used in this study. The research was supported by Texas A&M AgriLife  
484 Research Strategic Fellowship (Lia Murty) and Texas A&M T3: Triads for Transformation  
485 Program.

486

## 487 References

- 488
- 489 [1] 2020 Texas Agricultural Statistics Bulletin in: UsNASSTF Office (Ed.), United States Department of  
490 Agriculture,  
491 [https://www.nass.usda.gov/Statistics\\_by\\_State/Texas/Publications/Annual\\_Statistical\\_Bulletin/index](https://www.nass.usda.gov/Statistics_by_State/Texas/Publications/Annual_Statistical_Bulletin/index.php)  
492 [.php](https://www.nass.usda.gov/Statistics_by_State/Texas/Publications/Annual_Statistical_Bulletin/index.php), 2020.
- 493 [2] Witt TWU, Mauricio; Schwartz, Robert C.; Ritchie, Glen L. . Response to deficient irrigation of  
494 morphological, yield, and fiber quality traits of upland (*Gossypium hirsutum* L.) and Pima (G.  
495 *barbadense* L.) cotton in the Texas High Plains. *Field Crops Research* 2020;249.
- 496 [3] Skovgaard K, Nirenberg HI, O'Donnell K, Rosendahl S. Evolution of *Fusarium oxysporum* f. sp.  
497 *vasinfectum* Races Inferred from Multigene Genealogies. *Phytopathology* 2001;91:1231-7.
- 498 [4] Watkins GM (Ed.), *Compendium of Cotton Diseases*. The American Phytopathological Society, 1981.
- 499 [5] Bell AA, Kemerait RC, Ortiz CS, Prom S, Quintana J, Nichols RL, et al. Genetic Diversity, Virulence,  
500 and *Meloidogyne incognita* Interactions of *Fusarium oxysporum* Isolates Causing Cotton Wilt in  
501 Georgia. *Plant Dis* 2017;101:948-56.
- 502 [6] Kim Y, Hutmacher RB, Davis RM. Characterization of California Isolates of *Fusarium oxysporum* f.  
503 *sp. vasinfectum*. *Plant Dis* 2005;89:366-72.
- 504 [7] Bell AA, Gu A, Olvey J, Wagner TA, Tashpulatov JJ, Prom S, et al. Detection and Characterization of  
505 *Fusarium oxysporum* f. sp. *vasinfectum* VCG0114 (Race 4) Isolates of Diverse Geographic Origins.  
506 *Plant Dis* 2019;103:1998-2009.
- 507 [8] Zhu Y, Lujan PA, Wedegaertner T, Nichols R, Abdelraheem A, Zhang JF, et al. First Report of  
508 *Fusarium oxysporum* f. sp. *vasinfectum* Race 4 Causing *Fusarium* Wilt of Cotton in New Mexico,  
509 USA. *Plant Disease* 2020;104:588-.
- 510 [9] Liu J, Bell AA, Wheeler MH, Stipanovic RD, Puckhaber LS. Phylogeny and pathogenicity of  
511 *Fusarium oxysporum* isolates from cottonseed imported from Australia into California for dairy  
512 cattle feed. *Can J Microbiol* 2011;57:874-86.
- 513 [10] Contreras-Cornejo HA, Macias-Rodriguez L, Herrera-Estrella A, Lopez-Bucio J. The 4-  
514 phosphopantetheinyl transferase of *Trichoderma virens* plays a role in plant protection against  
515 *Botrytis cinerea* through volatile organic compound emission. *Plant Soil* 2014;379:261-74.
- 516 [11] Mazzola M, Freilich S. Prospects for biological soilborne disease control: application of indigenous  
517 versus synthetic microbiomes. *Phytopathol.* 2017;107:256-63.
- 518 [12] Syed-Ab-Rahman SF, Carvalhais LC, Chua ET, Chung FY, Moyle PM, Eltanahy EG, et al. Soil  
519 bacterial diffusible and volatile organic compounds inhibit *Phytophthora capsici* and promote plant  
520 growth. *Sci Total Environ* 2019;692:267-80.
- 521 [13] Asari S, Matzen S, Petersen MA, Bejai S, Meijer J. Multiple effects of *Bacillus amyloliquefaciens*  
522 volatile compounds: plant growth promotion and growth inhibition of phytopathogens. *FEMS*  
523 *Microbiol Ecol* 2016;92:fiw070.
- 524 [14] Chaves-Lopez C, Serio A, Gianotti A, Sacchetti G, Ndagijimana M, Ciccarone C, et al. Diversity of  
525 food-borne *Bacillus* volatile compounds and influence on fungal growth. *J Appl Microbiol*  
526 2015;119:487-99.
- 527 [15] Cordovez V, Carrion VJ, Etalo DW, Mumm R, Zhu H, van Wezel GP, et al. Diversity and functions  
528 of volatile organic compounds produced by *Streptomyces* from a disease-suppressive soil. *Front*  
529 *Microbiol* 2015;6:1081.

- 530 [16] Wu Y, Yuan J, E Y, Raza W, Shen Q, Huang Q. Effects of volatile organic compounds from  
531 *Streptomyces albulus* NJZSA2 on growth of two fungal pathogens. *J Basic Microbiol*  
532 2015;55:1104-17.
- 533 [17] Tilocca B, Cao A, Migheli Q. Scent of a Killer: Microbial Volatilome and Its Role in the Biological  
534 Control of Plant Pathogens. *Front Microbiol* 2020;11:41.
- 535 [18] Choudoir M, Rossabi S, Gebert M, Helmig D, Fierer N. A Phylogenetic and Functional Perspective  
536 on Volatile Organic Compound Production by Actinobacteria. *mSystems* 2019;4.
- 537 [19] Dias MP, Bastos MS, Xavier VB, Cassel E, Astarita LV, Santarem ER. Plant growth and resistance  
538 promoted by *Streptomyces* spp. in tomato. *Plant Physiol Bioch* 2017;118:479-93.
- 539 [20] Stahl PD, Parkin TB. Microbial production of volatile organic compounds in soil microcosms. *Soil*  
540 *Sci Soc Am J* 1996;60:821-8.
- 541 [21] Qi D, Zou L, Zhou D, Chen Y, Gao Z, Feng R, et al. Taxonomy and Broad-Spectrum Antifungal  
542 Activity of *Streptomyces* sp. SCA3-4 Isolated From Rhizosphere Soil of *Opuntia stricta*. *Front*  
543 *Microbiol* 2019;10:1390.
- 544 [22] Singh RP, Manchanda G, Maurya IK, Maheshwari NK, Tiwari PK, Rai AR. *Streptomyces* from  
545 rotten wheat straw endowed the high plant growth potential traits and agro-active compounds.  
546 *Biocatal Agric Biote* 2019;17:507-13.
- 547 [23] Hagn A, Engel M, Kleikamp B, Munch JC, Schloter M, Bruns C. Microbial community shifts in  
548 *Pythium ultimum*-inoculated suppressive substrates. *Biology and Fertility of Soils* 2008;44:481-90.
- 549 [24] Yao H, Wu F. Soil microbial community structure in cucumber rhizosphere of different resistance  
550 cultivars to fusarium wilt. *FEMS Microbiol Ecol* 2010;72:456-63.
- 551 [25] Cianchetta AN, Davis RM. Fusarium wilt of cotton: Management strategies. *Crop Protection*  
552 2015;73:40-4.
- 553 [26] Isakeit TU, Mauricio; Hutmacher, Robert; Idowu, John; Nichols, Robert. Identification and  
554 Management of Fusarium Wilt Race 4 of Cotton in Texas and New Mexico. 2019.
- 555 [27] Aslam Z, Yasir M, Yoon HS, Jeon CO, Chung YR. Diversity of the bacterial community in the rice  
556 rhizosphere managed under conventional and no-tillage practices. *Journal of Microbiology*  
557 2013;51:747-56.
- 558 [28] Dowd C, Wilson IW, McFadden H. Gene expression profile changes in cotton root and hypocotyl  
559 tissues in response to infection with *Fusarium oxysporum* f. sp. *vasinfectum*. *Mol Plant Microbe*  
560 *Interact* 2004;17:654-67.
- 561 [29] Yuan J, Raza W, Shen Q, Huang Q. Antifungal activity of *Bacillus amyloliquefaciens* NJN-6 volatile  
562 compounds against *Fusarium oxysporum* f. sp. *cubense*. *Appl Environ Microbiol* 2012;78:5942-4.
- 563 [30] Guevara-Avendano E, Bravo-Castillo KR, Monribot-Villanueva JL, Kiel-Martinez AL, Ramirez-  
564 Vazquez M, Guerrero-Analco JA, et al. Diffusible and volatile organic compounds produced by  
565 avocado rhizobacteria exhibit antifungal effects against *Fusarium kuroshium*. *Braz J Microbiol*  
566 2020;51:861-73.
- 567 [31] Seo DJ, Lee YS, Kim KY, Jung WJ. Antifungal activity of chitinase obtained from *Paenibacillus*  
568 *ehimensis* MA2012 against conidial of *Collectotrichum gloeosporioides* in vitro. *Microb Pathog*  
569 2016;96:10-4.
- 570 [32] Kim DS, Bae CY, Jeon JJ, Chun SJ, Oh HW, Hong SG, et al. *Paenibacillus elgii* sp. nov., with broad  
571 antimicrobial activity. *Int J Syst Evol Microbiol* 2004;54:2031-5.



- 572 [33] Naing KW, Nguyen XH, Anees M, Lee YS, Kim YC, Kim SJ, et al. Biocontrol of Fusarium wilt  
573 disease in tomato by *Paenibacillus ehimensis* KWN38. *World J Microbiol Biotechnol* 2015;31:165-  
574 74.
- 575 [34] Johnson ET, Bowman MJ, Dunlap CA. *Brevibacillus fortis* NRS-1210 produces edeines that inhibit  
576 the in vitro growth of conidia and chlamydospores of the onion pathogen *Fusarium oxysporum* f. sp.  
577 *cepae*. *Antonie Van Leeuwenhoek* 2020;113:973-87.
- 578 [35] Yang X, Yousef AE. Antimicrobial peptides produced by *Brevibacillus* spp.: structure, classification  
579 and bioactivity: a mini review. *World J Microbiol Biotechnol* 2018;34:57.
- 580 [36] Jiang H, Wang X, Xiao C, Wang W, Zhao X, Sui J, et al. Antifungal activity of *Brevibacillus*  
581 *laterosporus* JX-5 and characterization of its antifungal components. *World J Microbiol Biotechnol*  
582 2015;31:1605-18.
- 583 [37] Farag MA, Zhang H, Ryu CM. Dynamic chemical communication between plants and bacteria  
584 through airborne signals: induced resistance by bacterial volatiles. *J Chem Ecol* 2013;39:1007-18.
- 585 [38] Danial AM, Medina A, Sulyok M, Magan N. Efficacy of metabolites of a *Streptomyces* strain (AS1)  
586 to control growth and mycotoxin production by *Penicillium verrucosum*, *Fusarium verticillioides*  
587 and *Aspergillus fumigatus* in culture. *Mycotoxin Res* 2020;36:225-34.
- 588 [39] Encheva-Malinova M, Stoyanova M, Avramova H, Pavlova Y, Gocheva B, Ivanova I, et al.  
589 Antibacterial potential of streptomycete strains from Antarctic soils. *Biotechnol Biotec Eq*  
590 2014;28:721-7.
- 591 [40] Saadouli I, Zendah El Euch I, Trabelsi E, Mosbah A, Redissi A, Ferjani R, et al. Isolation,  
592 Characterization and Chemical Synthesis of Large Spectrum Antimicrobial Cyclic Dipeptide (l-leu-l-  
593 pro) from *Streptomyces misionensis*V16R3Y1 Bacteria Extracts. A Novel (1)H NMR Metabolomic  
594 Approach. *Antibiotics (Basel)* 2020;9.
- 595 [41] Scholler CE, Gurtler H, Pedersen R, Molin S, Wilkins K. Volatile metabolites from actinomycetes. *J*  
596 *Agric Food Chem* 2002;50:2615-21.
- 597 [42] Zhao L-J, Yang X-N, Li X-Y, Mu W, Liu F. Antifungal, Insecticidal and Herbicidal Properties of  
598 Volatile Components from *Paenibacillus polymyxa* Strain BMP-11. *Agricultural Sciences in China*  
599 2011;10:728-36.
- 600 [43] He CN, Ye WQ, Zhu YY, Zhou WW. Antifungal Activity of Volatile Organic Compounds Produced  
601 by *Bacillus methylotrophicus* and *Bacillus thuringiensis* against Five Common Spoilage Fungi on  
602 Loquats. *Molecules* 2020;25.
- 603 [44] Ortiz CS, Bell AA, Magill CW, Liu J. Specific PCR Detection of *Fusarium oxysporum* f. sp.  
604 *vasinfectum* California Race 4 Based on a Unique TfoI Insertion Event in the PHO Gene. *Plant Dis*  
605 2017;101:34-44.
- 606 [45] Wang C, Ulloa M, Duong T, Roberts PA. Quantitative Trait Loci Mapping of Multiple Independent  
607 Loci for Resistance to *Fusarium oxysporum* f. sp. *vasinfectum* Races 1 and 4 in an Interspecific  
608 Cotton Population. *Phytopathology* 2018;108:759-67.

609

610 **Table 1.**

611 Inhibition of Fov4 from bacterial exposure in co-culture and from VOCs in split plate assays.

| Co-culture Inhibition    |                          |                      | VOC Inhibition           |                          |                      |
|--------------------------|--------------------------|----------------------|--------------------------|--------------------------|----------------------|
| Comparisons <sup>a</sup> | %Inhibition <sup>b</sup> | p value <sup>d</sup> | Comparisons <sup>a</sup> | %Inhibition <sup>c</sup> | p value <sup>d</sup> |
| Rz141                    | 52%                      | <0.0001              | Rz 141, HC 658           | 26%                      | 0.0006               |
| Rz 160                   | 28%                      | <0.0001              | Rz 141                   | 24%                      | 0.0037               |
| HC 658                   | 28%                      | <0.0001              | HC 658                   | 9%                       | 0.3484               |
| ELP 745                  | 27%                      | <0.0001              |                          |                          |                      |
| Rz 141, HC 658           | 28%                      | 0.0029               |                          |                          |                      |
| Rz 141, Rz 160           | 24%                      | 0.0141               |                          |                          |                      |
| Rz 141, ELP 745          | 22%                      | 0.0174               |                          |                          |                      |

612

613 <sup>a</sup> Comparisons are of Fov4 exposed to VOC or co-culture with bacterial  
614 isolate ID listed. Comparisons are against negative  
615 control, Fov4 not exposed to bacteria or bacteria VOCs.

616 <sup>b</sup>Inhibition calculated from mean Fov4 area in co-culture by ImageJ software (n=3).

617 <sup>c</sup>Inhibition calculated from mean Fov4 area in split plate VOC assay (n=3).

618 <sup>d</sup>Values calculated from area analy one-way ANOVA and Tukey's post-test.

619

620

621 **Table 2.**  
622 Disease severity and incidence observed at the root shoot junction of Pima cotton seedlings  
623 exposed to VOCs from *Bacillus* Rz141 and *Streptomyces* HC658.  
624

|                       | <b>Root Shoot Junction</b> |                              |                          |
|-----------------------|----------------------------|------------------------------|--------------------------|
|                       | <i>Low</i> <sup>a</sup>    | <i>Moderate</i> <sup>b</sup> | <i>High</i> <sup>c</sup> |
| Fov4-                 | 52%                        | 0%                           | 0%                       |
| Fov4+                 | 4%                         | 0%                           | 35%                      |
| Rz141+, Fov4+         | 4%                         | 33%                          | 29%                      |
| HC658+, Fov4+         | 26%                        | 17%                          | 16%                      |
| Rz141+, HC658+, Fov4+ | 13%                        | 50%                          | 19%                      |

625 <sup>a</sup>*Low indicates coloring of green or green with pink.*

626 <sup>b</sup>*Moderate indicates coloring of pink*

627 <sup>c</sup>*High rating indicates black, brown, or dark purple coloring of external tissues.*

628

629

630

631 **Figure Legends**

632

633 **Fig. 1.** Antagonistic isolates identified by screening and 16s rRNA sequencing. Isolates were from  
634 cotton producing field in El Paso County (C and F), non-cotton producing field in Harris County  
635 (E) and from healthy cotton rhizosphere (A and B); (A) *Bacillus* Rz141, (B) *Brevibacillus* Rz160,  
636 (C) *Paenibacillus* ELP529, (D) Phylogenetic tree of isolated *Firmicutes* species, (E) *Streptomyces*  
637 HC658, (F) *Streptomyces* ELP745, (G) Phylogenetic tree of isolated *Streptomyces* species.

638

639 **Fig. 2.** Growth inhibition from co-culture of Fov4 with bacterial species. (A) Representative  
640 example of one inoculated colony of HC658, (B) example of one inoculated colony of Rz141, (C)  
641 example of single HC658 and Rz141 inoculated colony on one agar petri dish with Fov4, (D)  
642 graphical representation of Fov4 area growth during co-culture.

643

644 **Fig. 3.** VOC inhibition from the single isolate and combination of Rz141 and HC658. (A) Negative  
645 sample without Rz141 or HC658, (B) Fov4 exposed to HC658 VOCs grown in a physically  
646 separated plate, (C) Fov4 exposed to Rz141 VOCs, (D) Fov4 exposed to physically separated  
647 Rz141 and HC658 with only VOC exposure possible between Fov4 and bacteria, (E) Measured  
648 Fov4 area after exposure to bacterial VOCs, (F) Fov4 absorbance at 350 nm taken after 3 days of  
649 growth in liquid culture simultaneously exposed to VOCs from HC658, Rz141 and HC658 and  
650 Rz141 combination.

651

652 **Fig. 4.** Root shoot junction and leaf appearances associated with uninfected and Fov4 infected  
653 seedlings. (A-B) represent root shoot junction colors associated with healthy and uninfected

654 seedlings and these colors were given a disease rating of low, (C) represents a moderate disease  
655 rating of pink root shoot junction, (D) microscope image of low moderate disease rating at the root  
656 shoot junction, (E) leaf appearance of healthy seedlings associated with no wilt, (F-H) represent  
657 examples of root shoot junction colors associated with severe disease rating, (I) microscope image  
658 of severe disease rating showing internal tissue darkening, (J) leaf appearance of wilt associated  
659 with Fov4 infection.

660

661 **Fig. 5.** Results of Fov4 infected seedlings response to bacterial VOCs from *Streptomyces* HC658  
662 and *Bacillus* Rz141. (A) Internal root shoot junction (RSJ) tissue from Fov4 infected seedlings;  
663 (B) observation of internal RSJ coloring after exposure to Rz141 VOCs during infection; (C)  
664 internal RSJ HC658 internal tissue; (D) internal RSJ tissue from a combination of Rz141 and  
665 HC658 VOC exposure; (E) Graphical representation of the incidence of different colors of external  
666 tissue based on treatment group.

667

## Murty & Shim Fig. 1

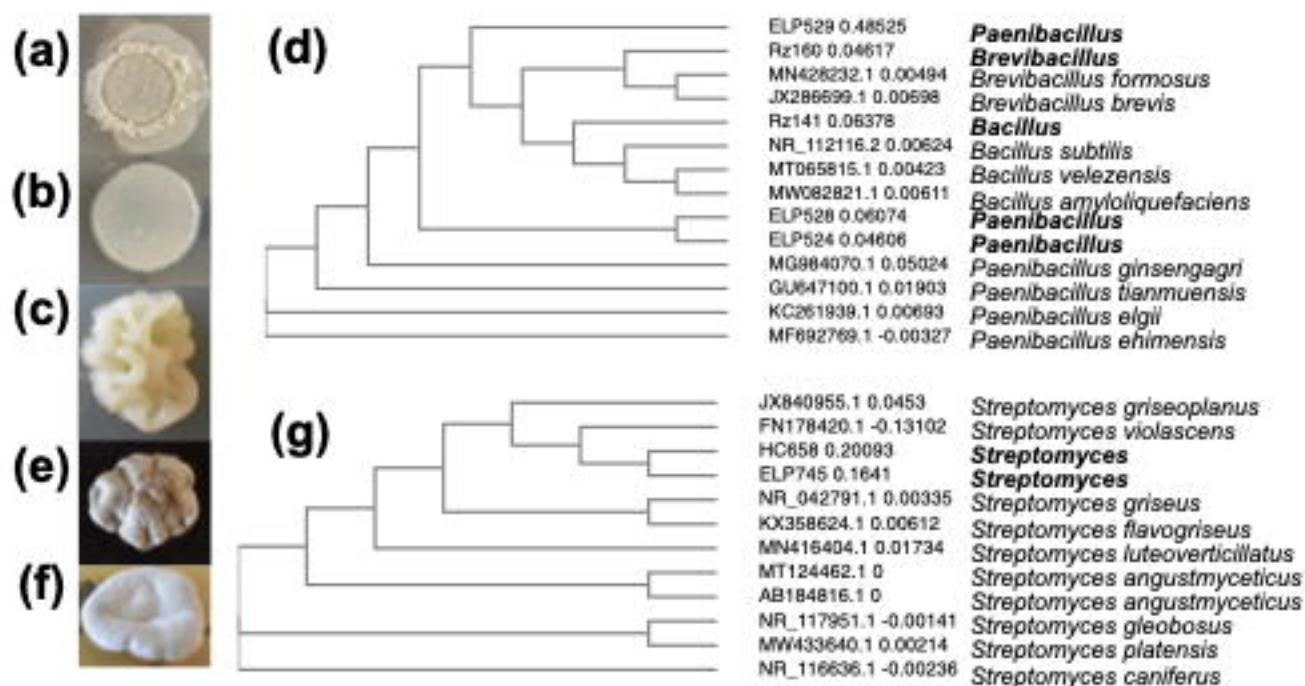

**Fig. 1.** Antagonistic isolates identified by screening and 16s rRNA sequencing. Isolates were from cotton producing field in El Paso County (C and F), non-cotton producing field in Harris County (E) and from healthy cotton rhizosphere (A and B); (A) *Bacillus* Rz 141, (B) *Brevibacillus* Rz 160, (C) *Paenibacillus* ELP 529, (D) Phylogenetic tree of isolated Firmicutes species, (E) *Streptomyces* HC658, (F) *Streptomyces* ELP 745, (G) Phylogenetic tree of isolated *Streptomyces* species.

## Murty & Shim Fig. 2

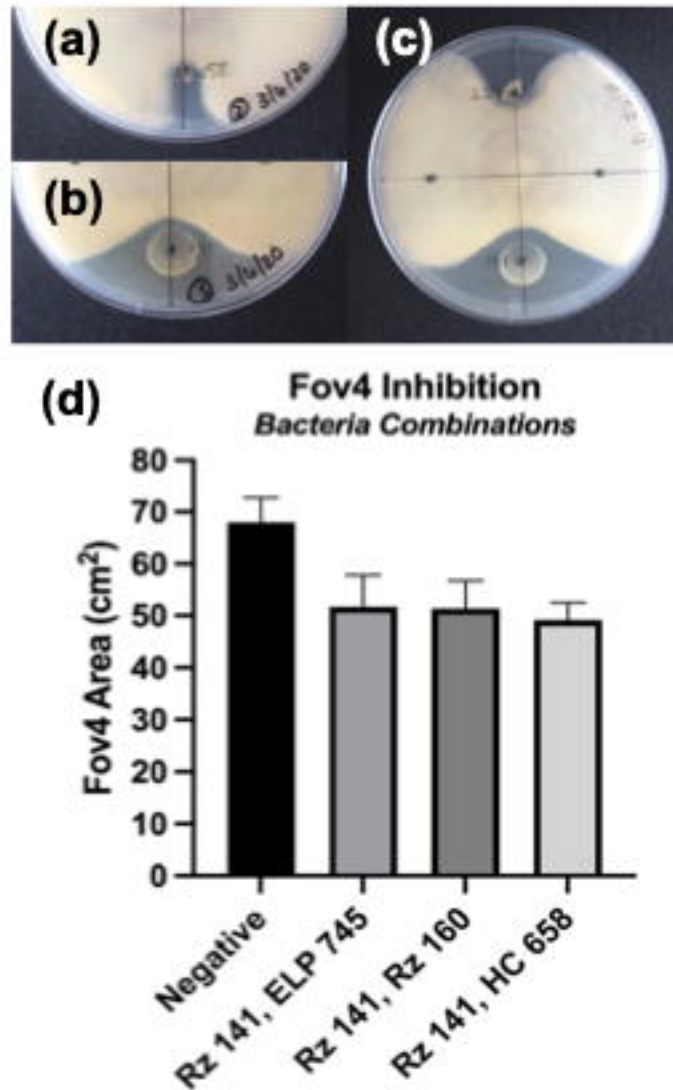

**Fig. 2.** Growth inhibition from co-culture of Fov4 with bacterial species. (A) Representative example of one inoculation spot of HC 658, (B) example of one inoculation spot of Rz 141, (C) example of one inoculation point of each HC 658 and Rz 141 on one agar petri dish with Fov4, (D) graphical representation of Fov4 area growth during co-culture.

### Murty & Shim Fig. 3

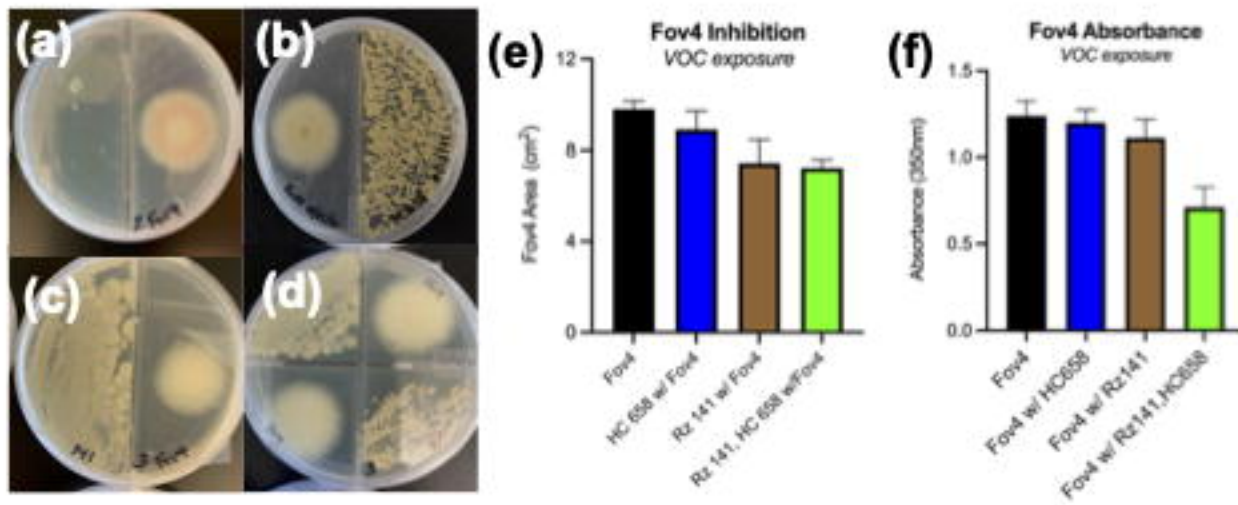

**Fig. 3.** VOC inhibition from the single isolate and combination of Rz 141 and HC 658. (A) Negative sample without Rz141 or HC658, (B) Fov4 exposed to HC658 VOCs grown in a physically separated plate, (C) Fov4 exposed to Rz141 VOCs, (D) Fov4 exposed to physically separated Rz 141 and HC 658 with only VOC exposure possible between Fov4 and bacteria, (E) Measured Fov4 area after exposure to bacterial VOCs, (F) Fov4 absorbance at 350nm taken after 3 days of growth in liquid culture simultaneously exposed to VOCs from HC658 and/or Rz141.



## Murty & Shim Fig. 4

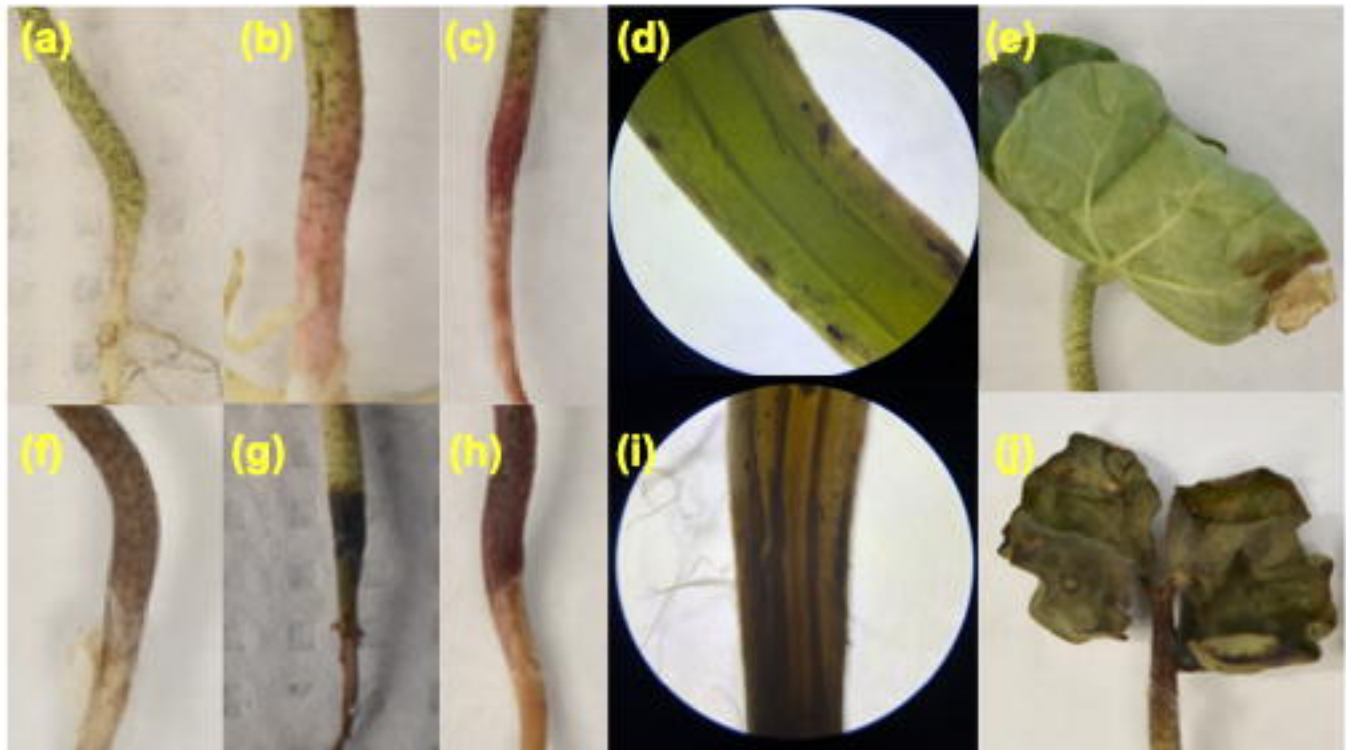

**Fig. 4.** Root shoot junction and leaf appearances associated with uninfected and Fov4 infected seedlings. (A-B) represent root shoot junction colors associated with healthy and uninfected seedlings and these colors were given a disease rating of low, (C) represents a moderate disease rating of pink root shoot junction, (D) microscope image of low moderate disease rating at the root shoot junction, (E) leaf appearance of healthy seedlings associated with no wilt, (F-H) represent examples of root shoot junction colors associated with severe disease rating, (I) microscope image of severe disease rating showing internal tissue darkening, (J) leaf appearance of wilt associated with Fov4 infection.

## Murty & Shim Fig. 5

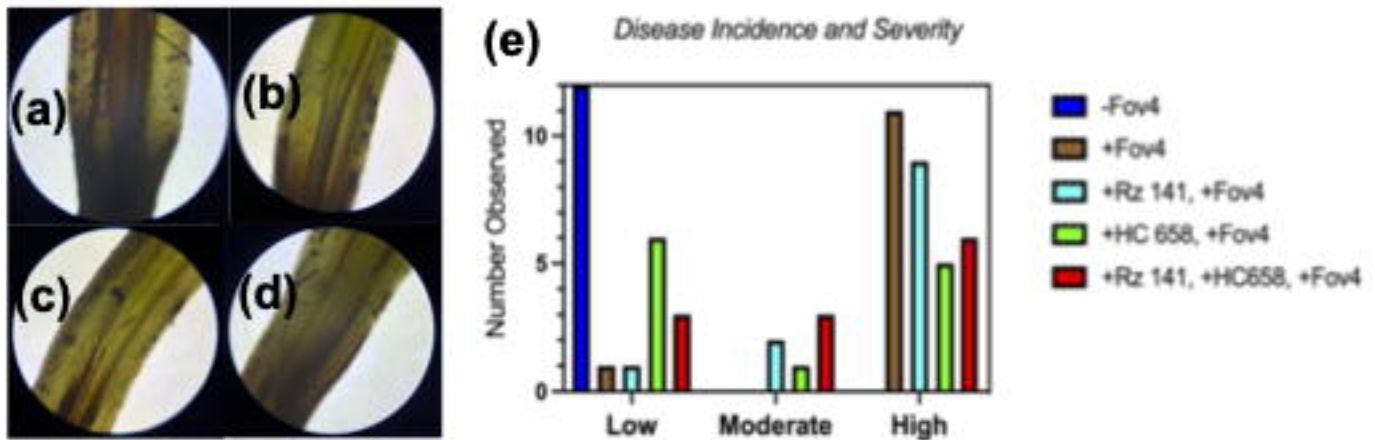

**Fig. 5.** Results of Fov4 infected seedlings response to bacterial VOCs from *Streptomyces* HC 658 and *Bacillus* RZ 141. (A) Internal RSJ tissue from Fov4 infected seedlings; (B) observation of internal RSJ coloring after exposure to RZ 141 VOCs during infection; (C) internal RSJ HC 658 internal tissue; (D) internal RSJ tissue from a combination of RZ 141 and HC 658 VOC exposure; (E) Graphical representation of the incidence of different colors of external RSJ tissue based on treatment group. Fig 5 E shows of the treatment groups, HC 658 had the highest number of seedlings which resembled the negative control group.
